# Supplementary figures and images for: Mass spectrometry provides accurate and sensitive quantitation of A2E
Source: Royal Society of Chemistry journal article supplement (doi:10.1039/c0pp00230e), 2010-10-08

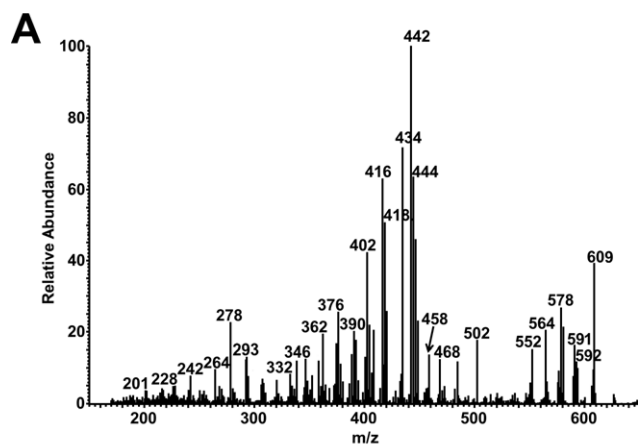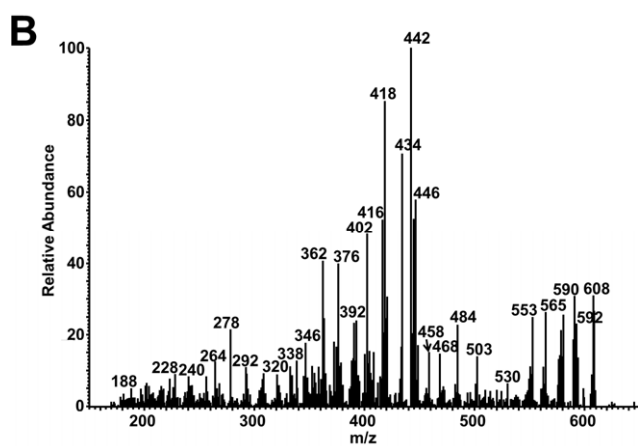

Supplement: c0pp00230e.pdf [file c0pp00230e.pdf]
